# Supplementary material
Source: PubMed Central journal article supplement (PMC3889476)
Supplement: NIHMS517203-supplement-2.pdf [file NIHMS517203-supplement-2.pdf]

**A** Viability, SUDHL-6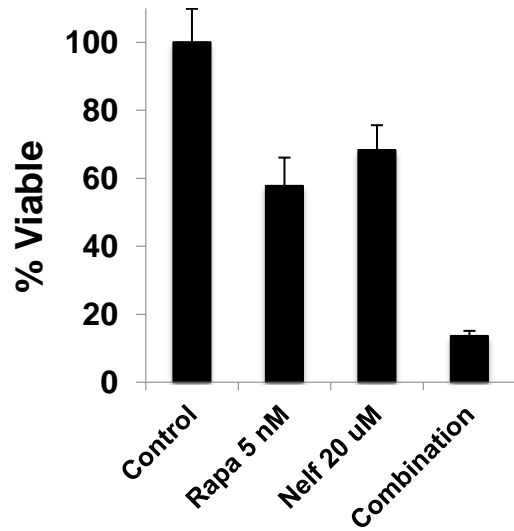**B** Combination Indices, Rapamycin + MK-2206

Petrich, et al

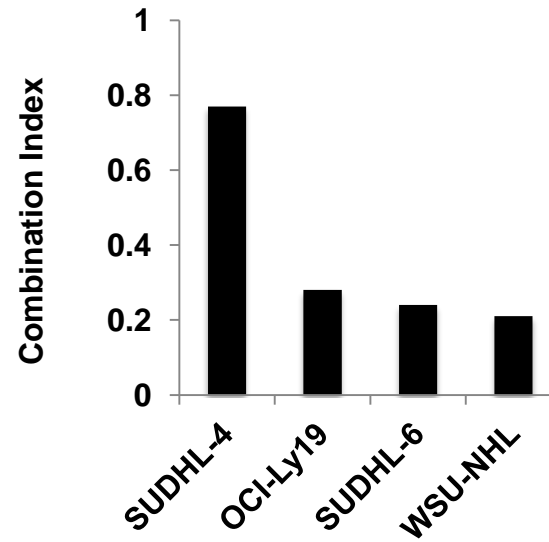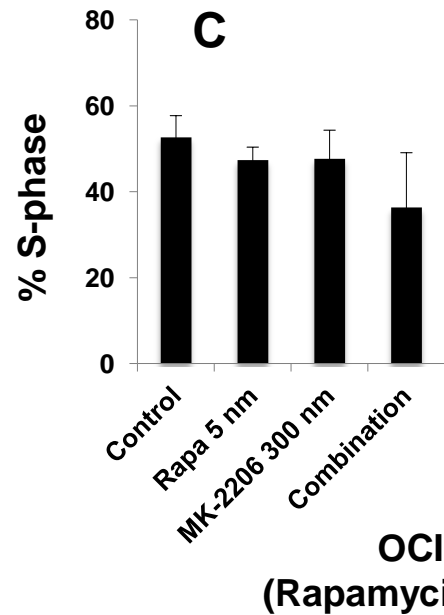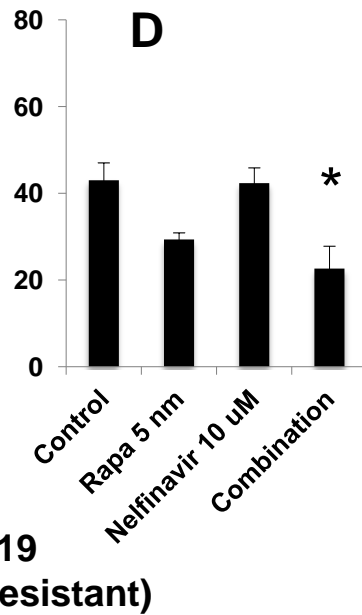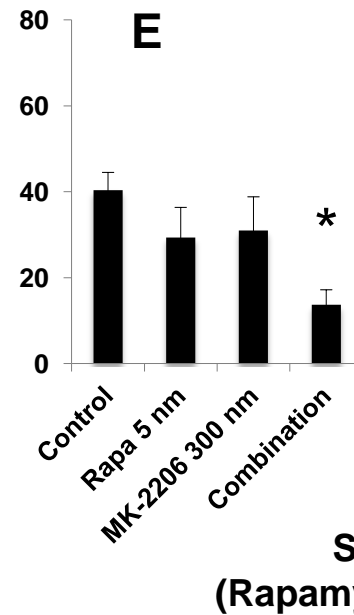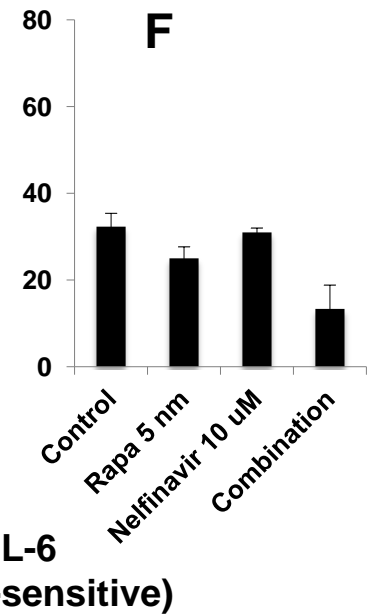

\* p&lt;0.05 for combination versus either drug alone

Supplementary Figure 2
