# Supplementary material
Source: PubMed Central journal article supplement (PMC3889476)

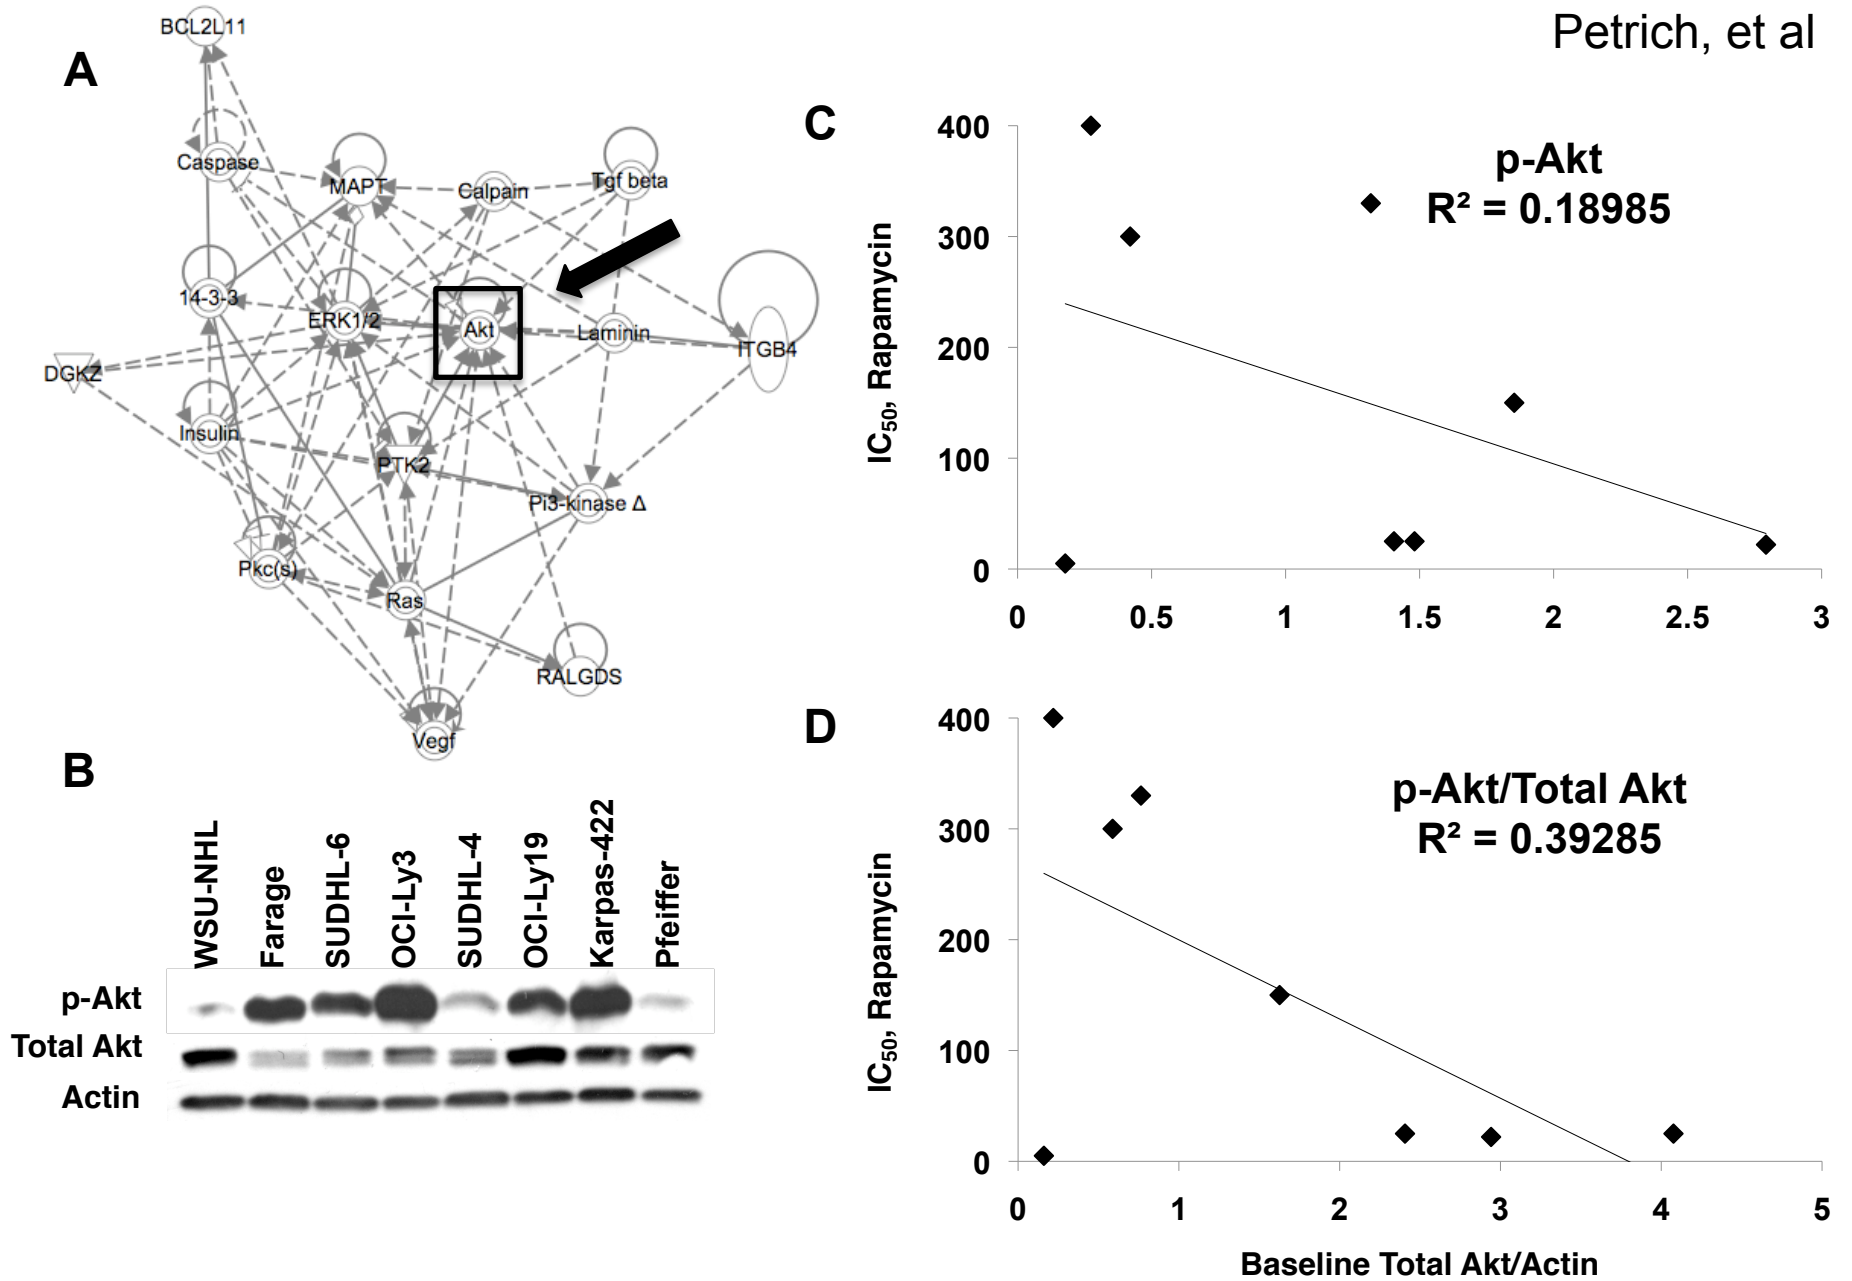

Supplementary Figure 1

Supplement: NIHMS517203-supplement-1.pdf [file NIHMS517203-supplement-1.pdf]

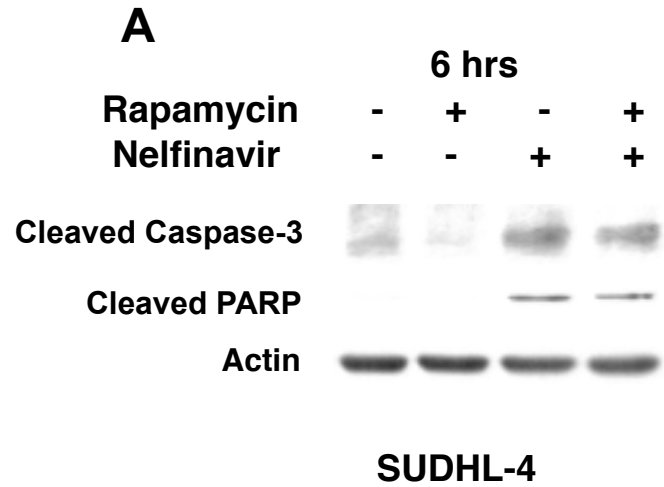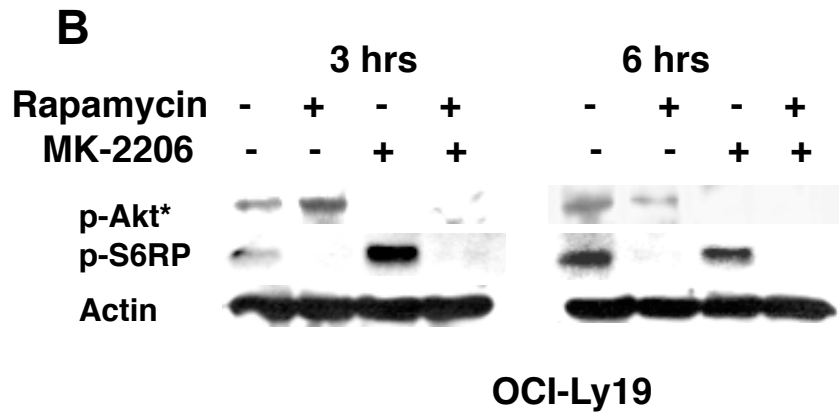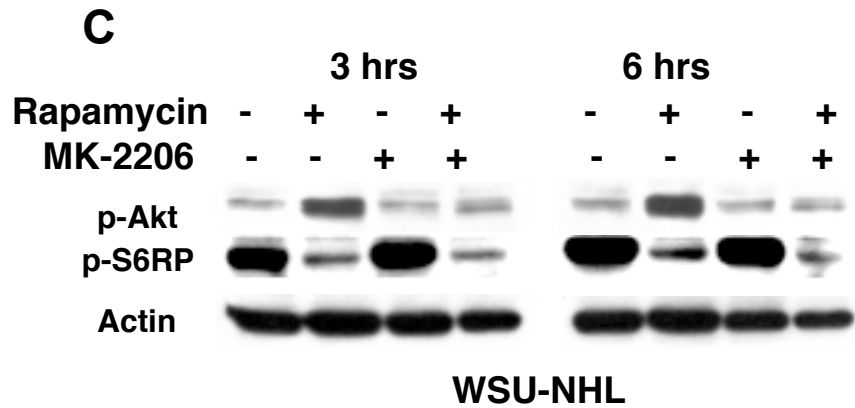

\* p<0.05 for combination versus either drug alone

Supplement: NIHMS517203-supplement-3.pdf [file NIHMS517203-supplement-3.pdf]

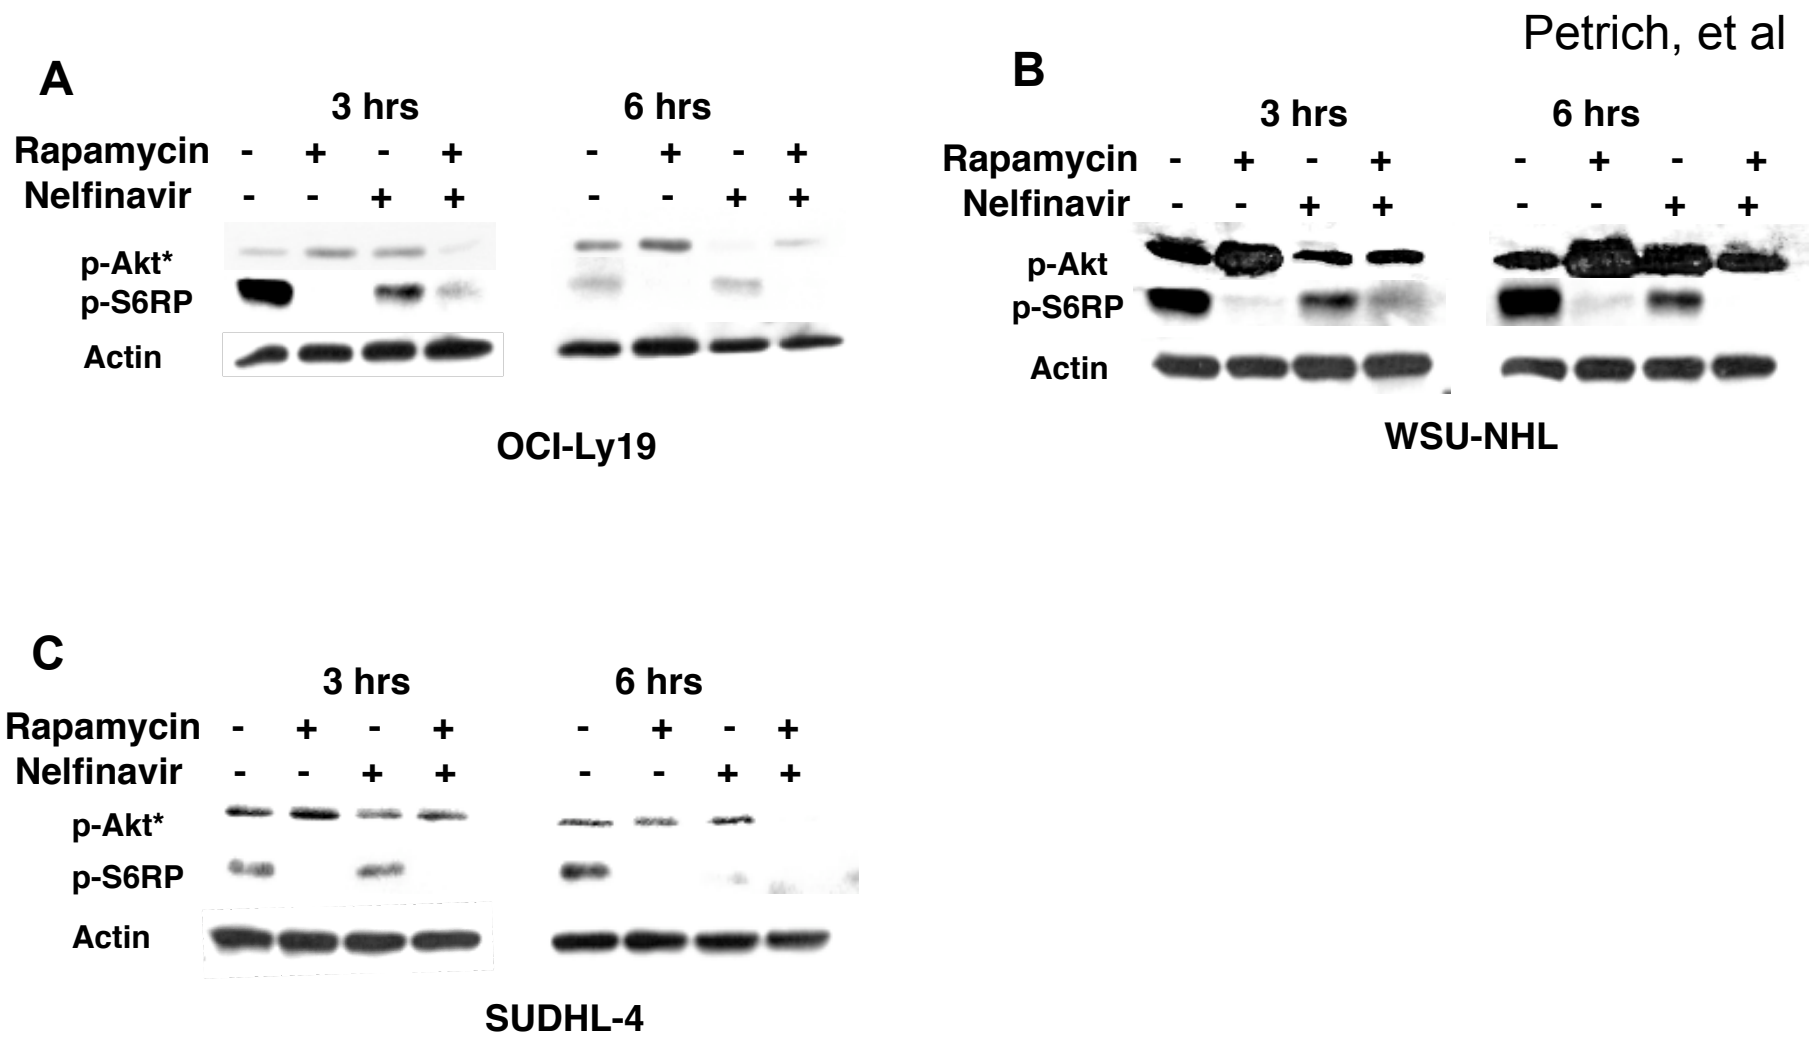

Supplementary Figure 4

Supplement: NIHMS517203-supplement-4.pdf [file NIHMS517203-supplement-4.pdf]

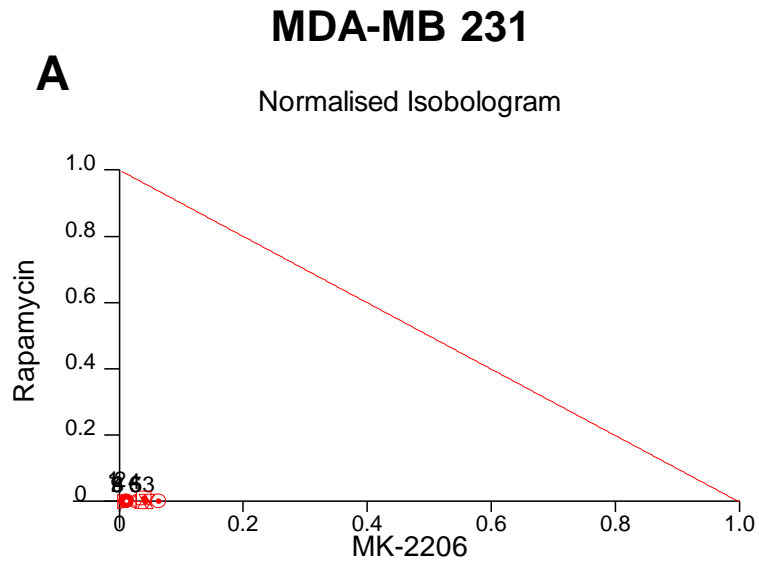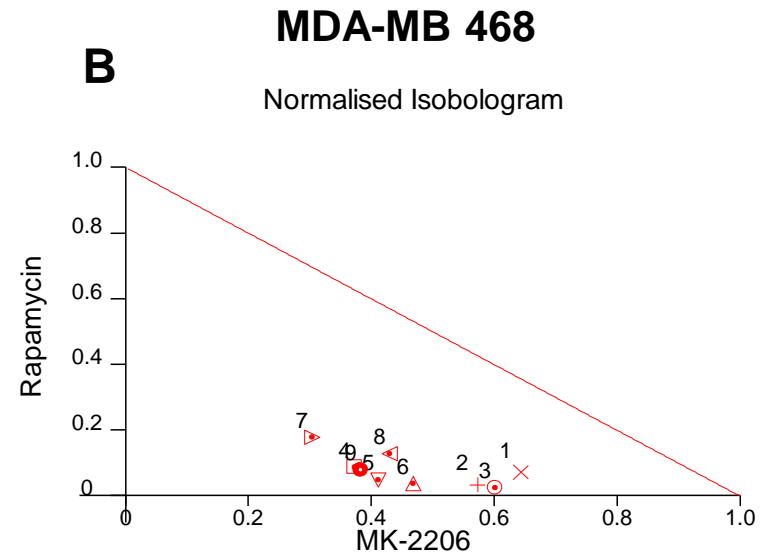

Supplement: NIHMS517203-supplement-5.pdf [file NIHMS517203-supplement-5.pdf]

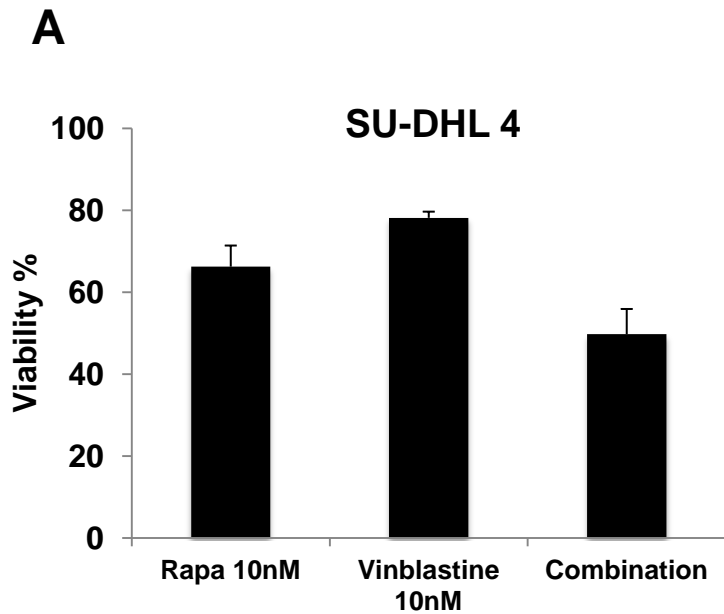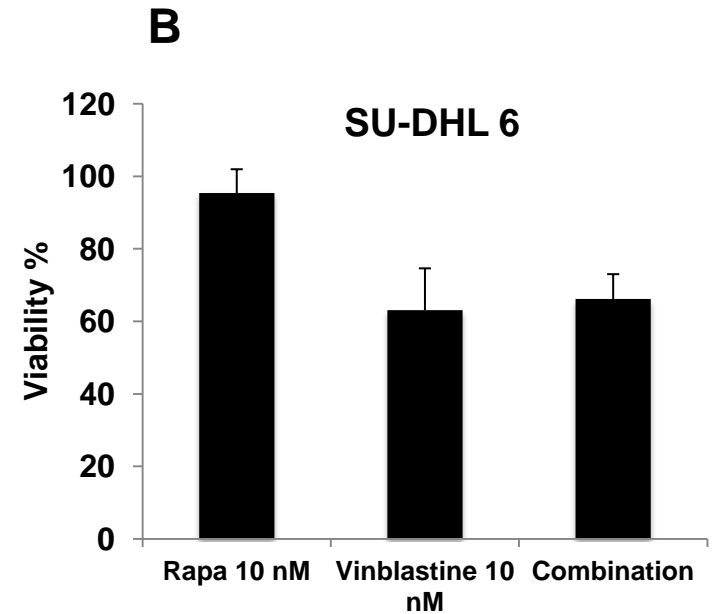

**C**

| [Rapa] (nM) | [Vinblastine] (nM) | Combination Index |
|-------------|--------------------|-------------------|
| 1           | 5                  | 1.648             |
| 10          | 10                 | 1.207             |
| 20          | 5                  | 1.474             |
| 20          | 10                 | 1.678             |

**D**

| [Rapa] (nM) | [Vinblastine] (nM) | Combination Index |
|-------------|--------------------|-------------------|
| 1           | 15                 | 1.176             |
| 10          | 10                 | 1.611             |
| 10          | 15                 | 1.368             |
| 20          | 15                 | 1.616             |

Supplement: NIHMS517203-supplement-6.pdf [file NIHMS517203-supplement-6.pdf]

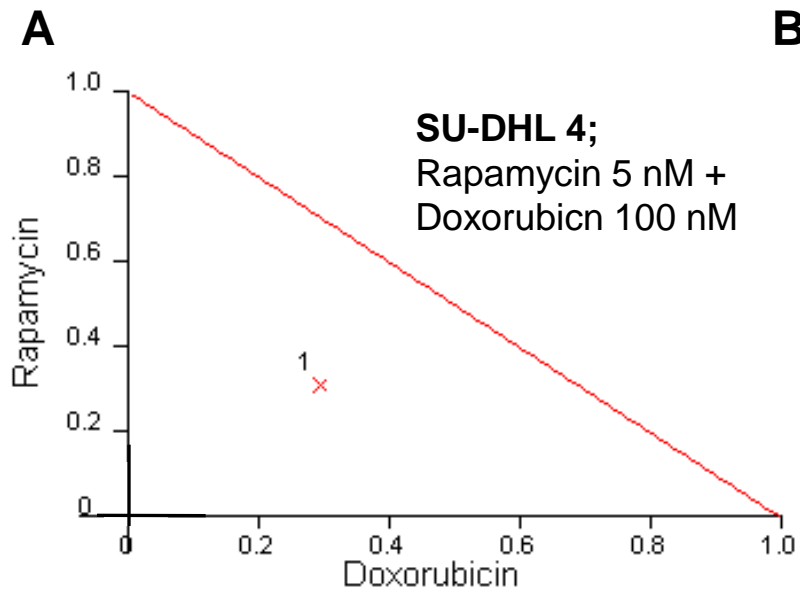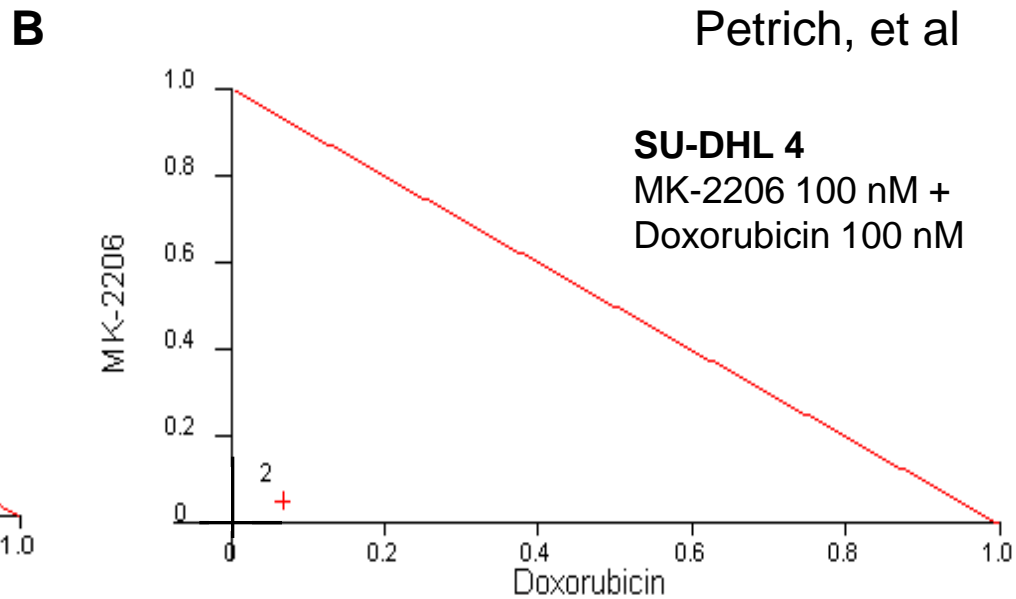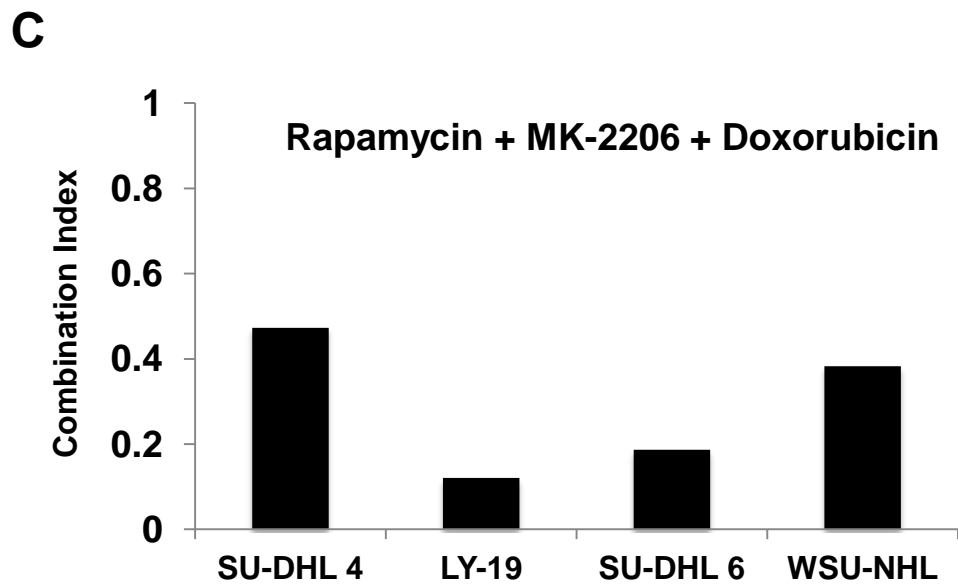

Supplement: NIHMS517203-supplement-7.pdf [file NIHMS517203-supplement-7.pdf]
